# Supplementary material
Source: PubMed Central journal article supplement (PMC9857799)
Supplement: jamapsychiatry-e224436-s003.pdf [file jamapsychiatry-e224436-s003.pdf]

## Data Sharing Statement

Niendam. Effect of Technology-Enhanced Screening in Addition to Standard Targeted Clinician Education on the Duration of Untreated Psychosis. *JAMA Psychiatry*. Published January 04, 2023. doi:10.1001/jamapsychiatry.2022.4436

### Data

**Data available:** No
